# Supplementary material for: Factors Influencing Bacterial Diversity and Community Composition in Municipal Drinking Waters in the Ohio River Basin, USA
Source: PubMed Central journal article supplement (PMC4928833; doi:10.1371/journal.pone.0157966), 2016-06-30

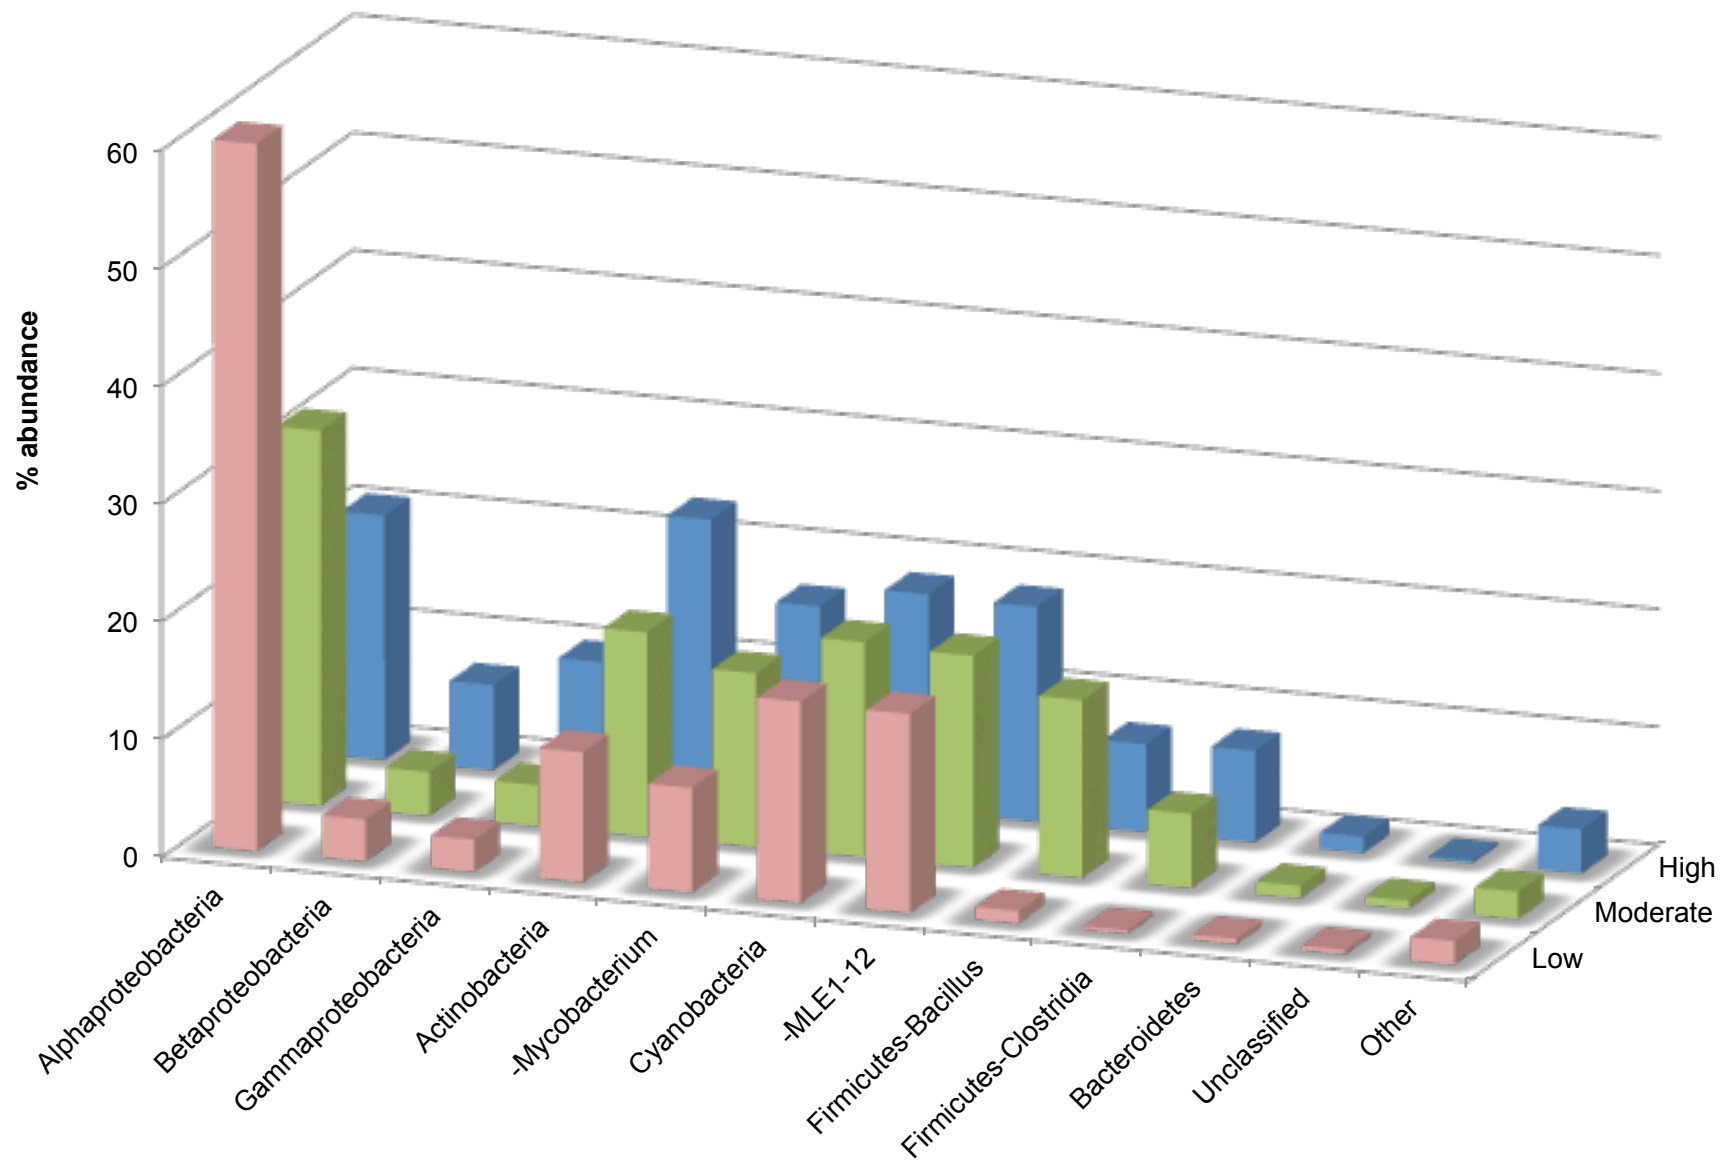

Supplement: pone.0157966.s006.pdf [file pone.0157966.s006.pdf]
